# Supplementary material for: Coiled-Coil Proteins Facilitated the Functional Expansion of the Centrosome
Source: PubMed Central journal article supplement (PMC4046923; doi:10.1371/journal.pcbi.1003657), 2014-06-05

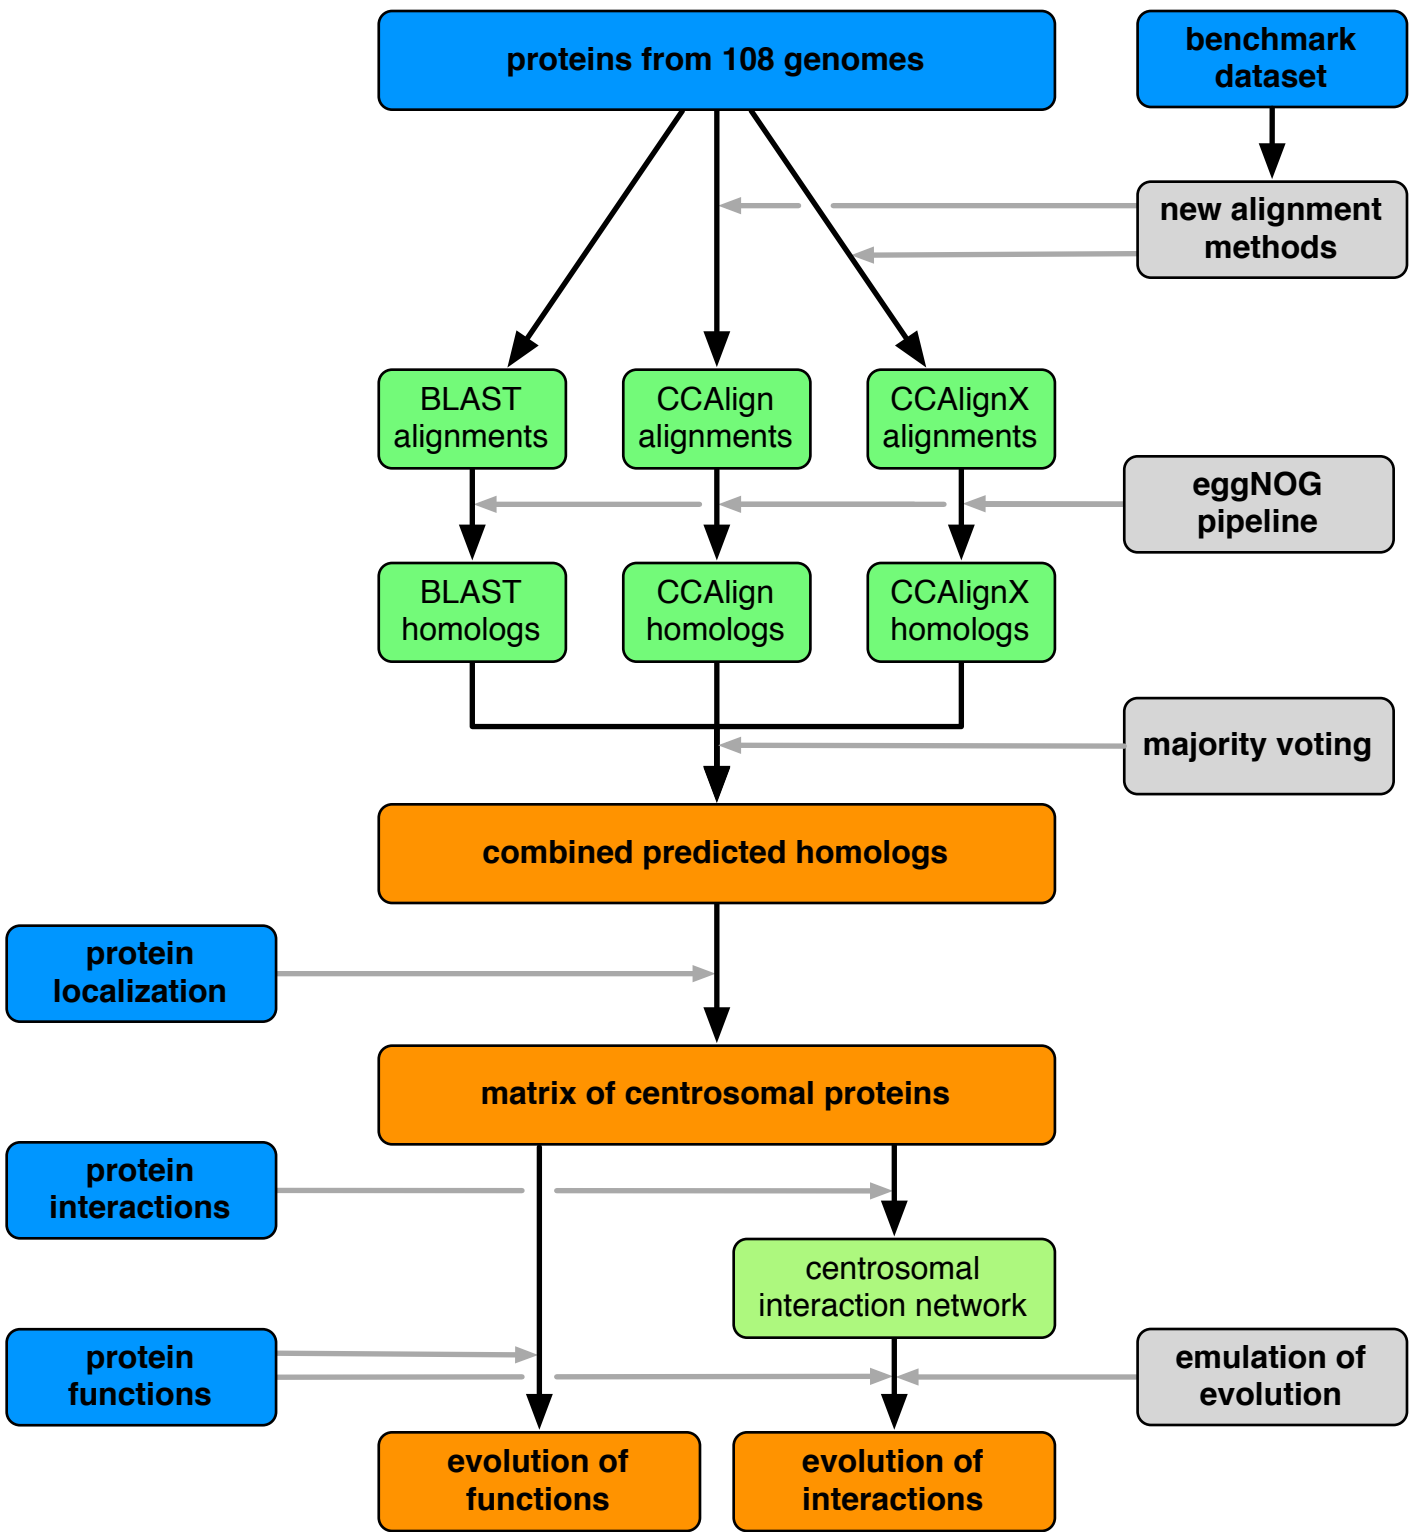

Supplement: pcbi.1003657.s001.pdf [file pcbi.1003657.s001.pdf]
