# Supplementary material for: Coiled-Coil Proteins Facilitated the Functional Expansion of the Centrosome
Source: PubMed Central journal article supplement (PMC4046923; doi:10.1371/journal.pcbi.1003657), 2014-06-05
Supplement: pcbi.1003657.s002.pdf [file pcbi.1003657.s002.pdf]

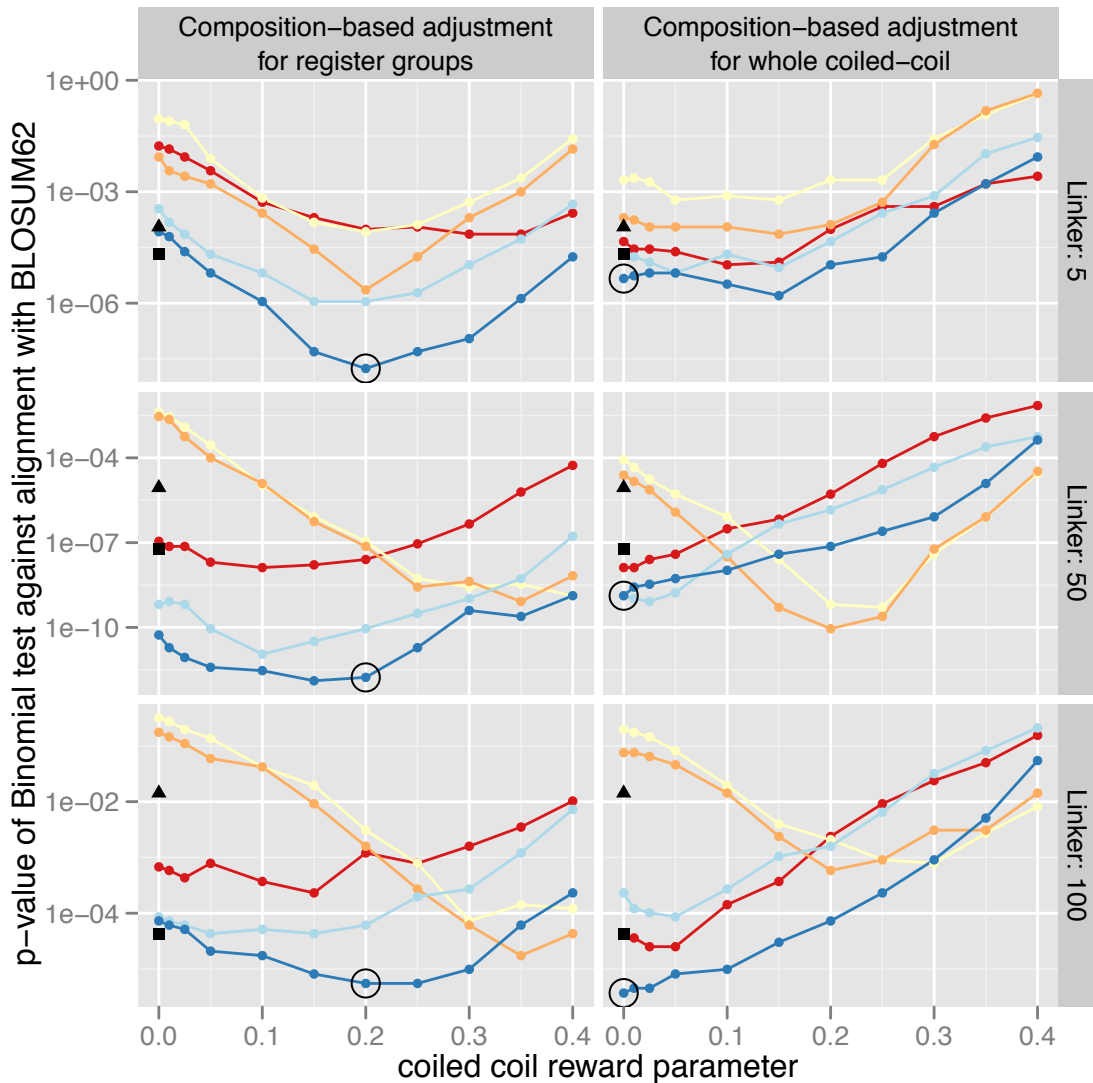

p-value of Binomial test against alignment with BLOSUM62

Composition-based adjustment for register groups

Composition-based adjustment for whole coiled-coil

Linker: 5

Linker: 50

Linker: 100

coiled coil reward parameter

**Method**
