# Supplementary material for: Coiled-Coil Proteins Facilitated the Functional Expansion of the Centrosome
Source: PubMed Central journal article supplement (PMC4046923; doi:10.1371/journal.pcbi.1003657), 2014-06-05
Supplement: pcbi.1003657.s006.pdf [file pcbi.1003657.s006.pdf]

### Coiled-coil and other proteins as backbone

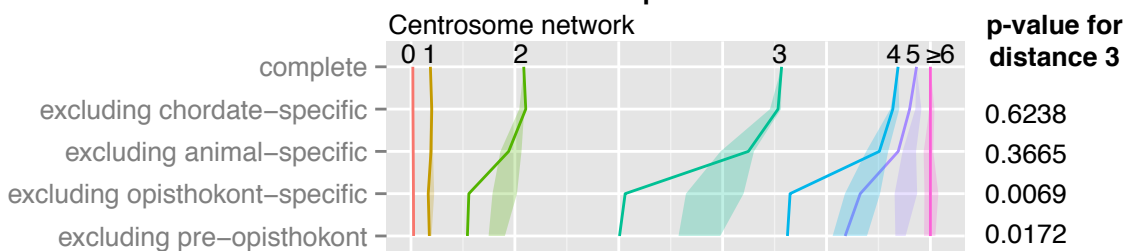

protein set

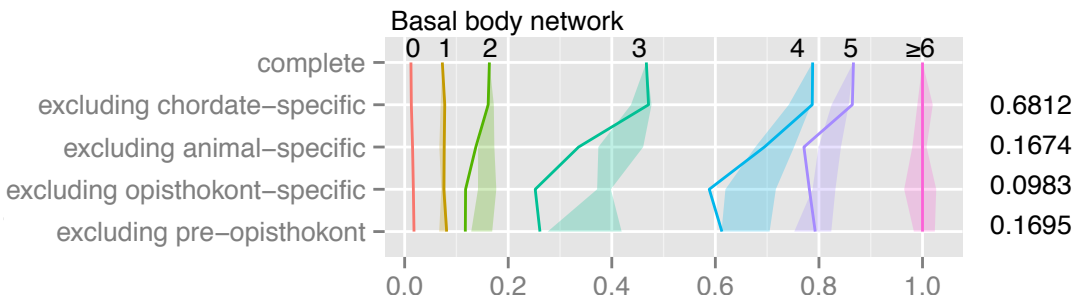

### Centrosome network, only considering paths for PCM proteins

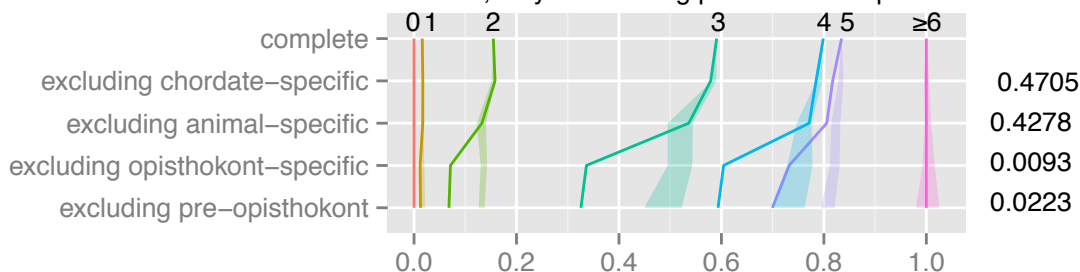

### Only coiled-coil proteins as backbone

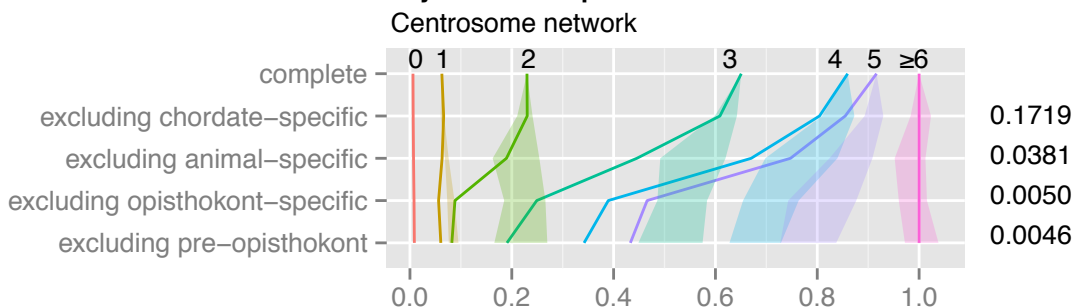

protein set

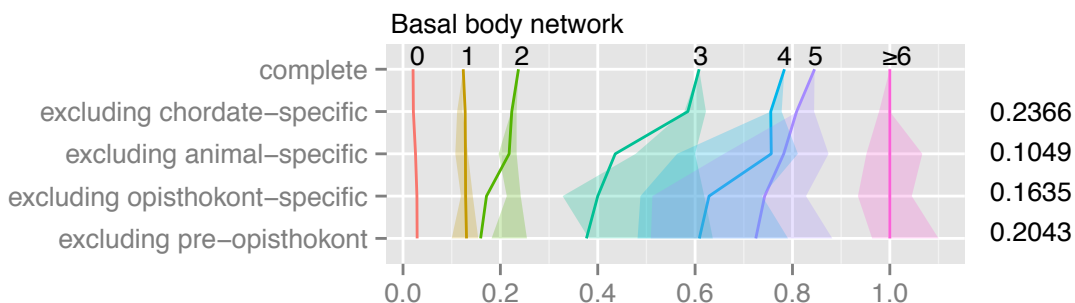

### Centrosome network, only considering paths for PCM proteins

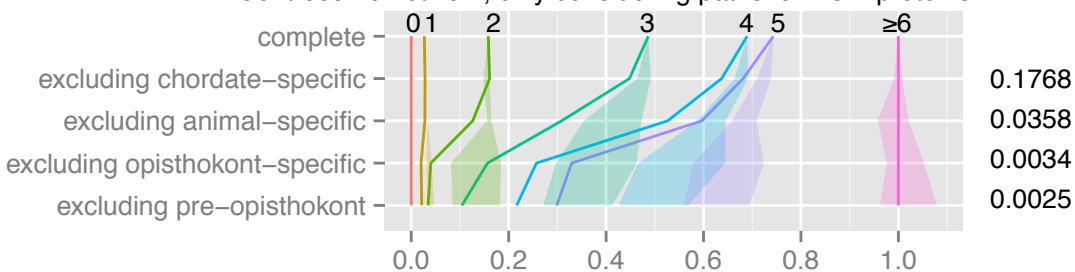

fraction of proteins reached within distance
