# Supplementary material for: Coiled-Coil Proteins Facilitated the Functional Expansion of the Centrosome
Source: PubMed Central journal article supplement (PMC4046923; doi:10.1371/journal.pcbi.1003657), 2014-06-05
Supplement: pcbi.1003657.s009.pdf [file pcbi.1003657.s009.pdf]

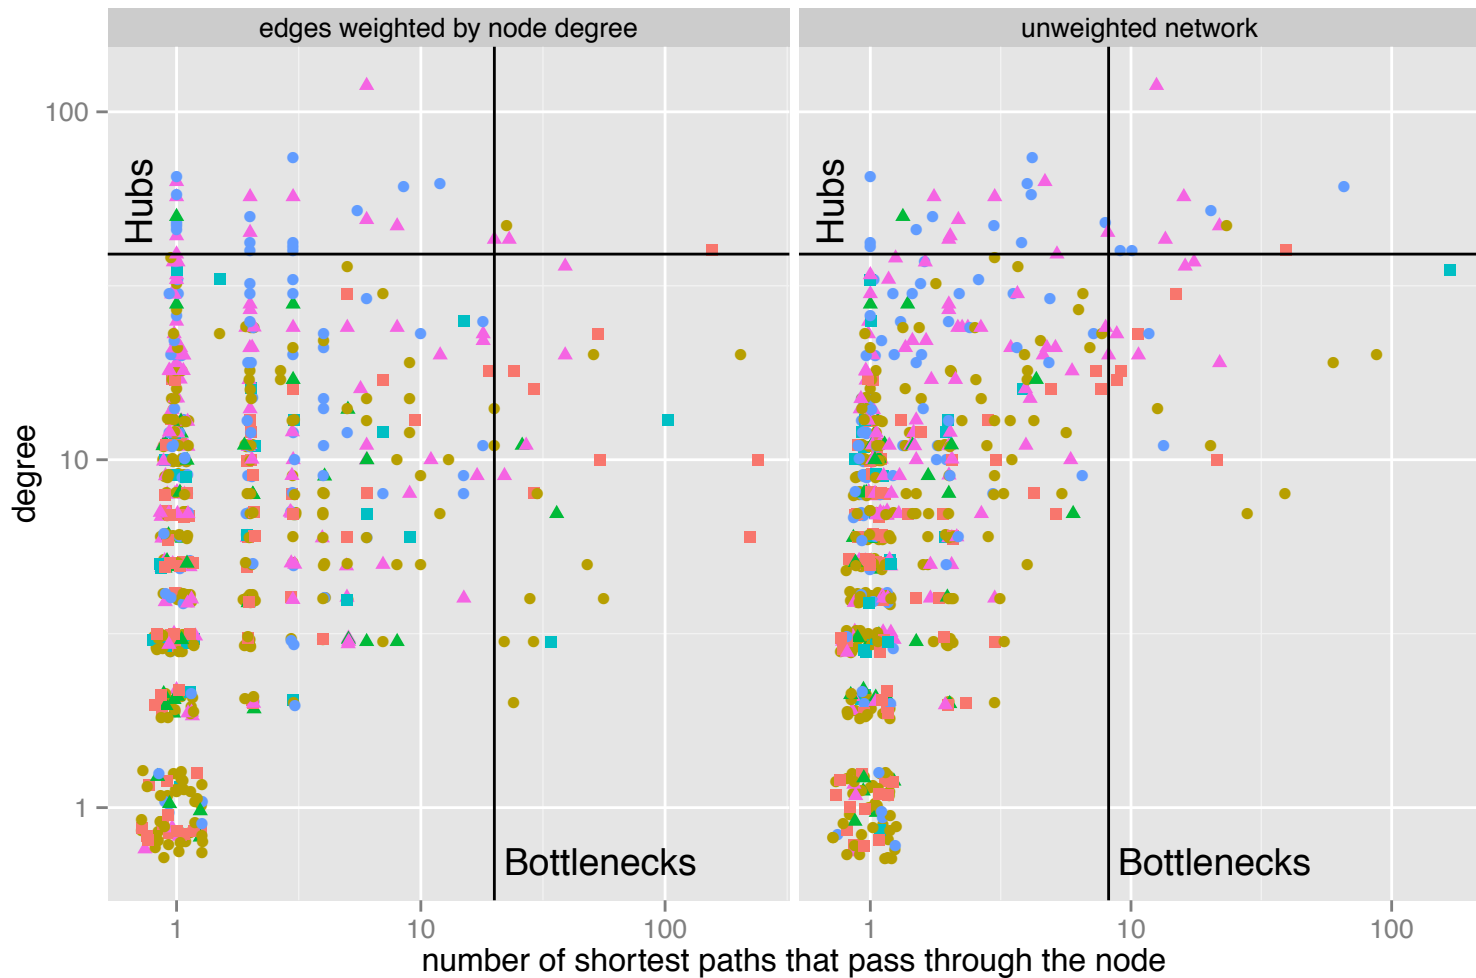

**kind** ■ coiled coil ● other ▲ enzyme ■ motor & cytoskeleton ● kinase & phosphatase ▲ regulation
