# Supplementary material for: Coiled-Coil Proteins Facilitated the Functional Expansion of the Centrosome
Source: PubMed Central journal article supplement (PMC4046923; doi:10.1371/journal.pcbi.1003657), 2014-06-05
Supplement: pcbi.1003657.s011.pdf [file pcbi.1003657.s011.pdf]

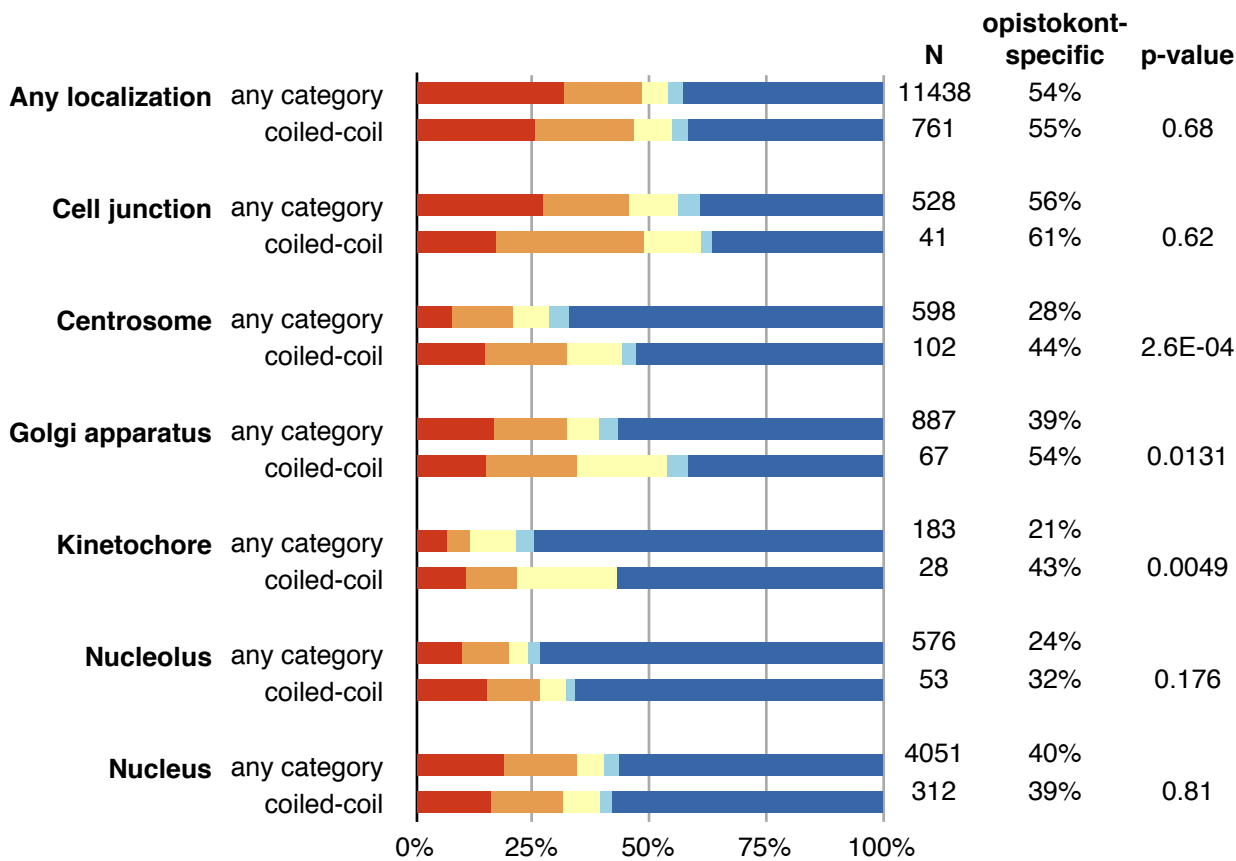

■ chordate-specific   
 ■ animal-specific   
 ■ opisthokont-specific   
 ■ pre-opisthokont   
 ■ universal
