# Supplementary material for: Coiled-Coil Proteins Facilitated the Functional Expansion of the Centrosome
Source: PLOS journal article supplement (doi:10.1371/journal.pcbi.1003657), 2014-06-05
Supplement: S13 (10.1371/journal.pcbi.1003657.s013) [file journal.pcbi.1003657.s013]

**a**

CCAlign:

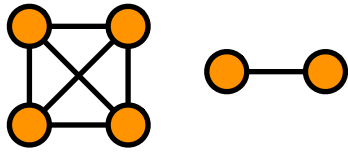

CCAlignX:

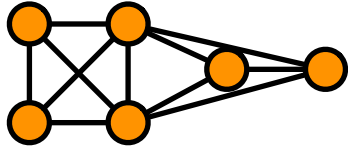

BLAST:

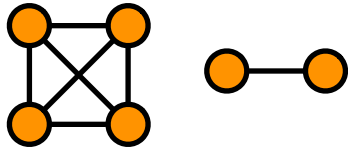Result of majority  
voting: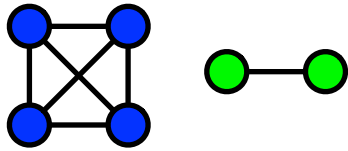no proteins with high  
betweenness centrality**b**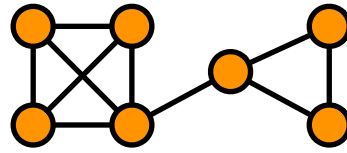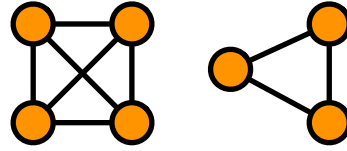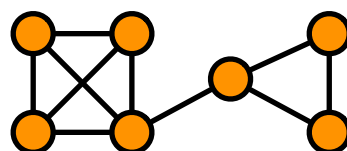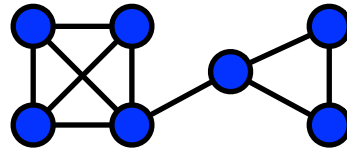two proteins with high  
betweenness centrality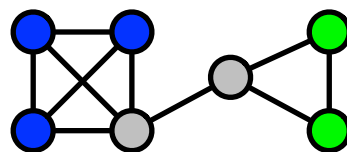temporarily remove these  
two proteins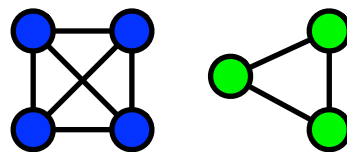the group splits into two groups,  
put removed proteins back
